# Supplementary figures and images for: Phosphatidylinositol 4,5-bisphosphate optical uncaging potentiates exocytosis
Source: eLife journal article supplement (doi:10.7554/elife.30203), 2017-10-25

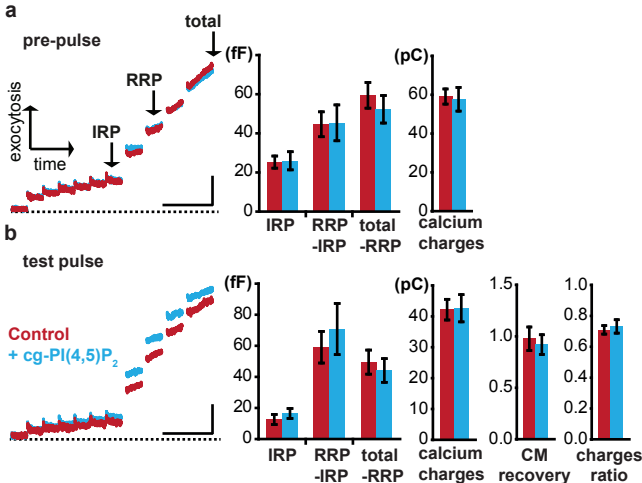

Walter et al., Fig. 4 - Figure supplement 1

Supplement: supp [file elife-30203-supp-v1.zip]

**a**before  $M_1R$  activation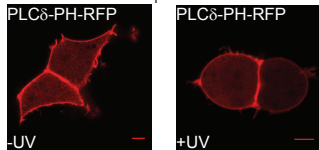after  $M_1R$  activation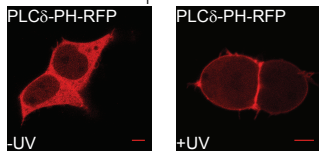**b**before  $M_1R$  activation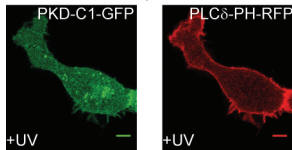after  $M_1R$  activation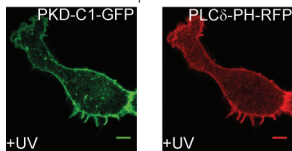**c**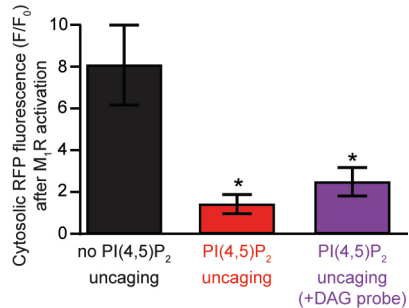

Supplement: supp [file elife-30203-supp-v1.zip]

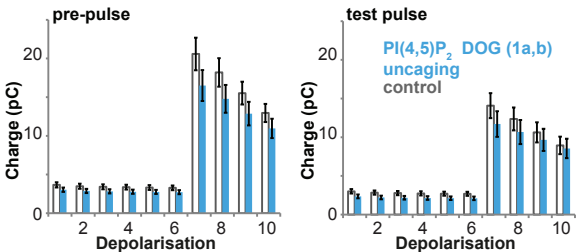

Walter et al., Fig. 4 - Figure supplement 2

Supplement: supp [file elife-30203-supp-v1.zip]

**Uncaging flash #1**

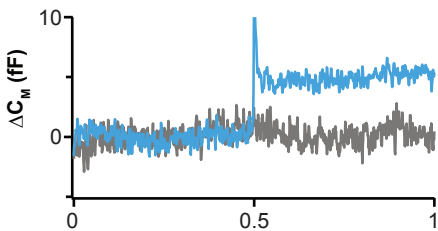

**Uncaging flash #2**

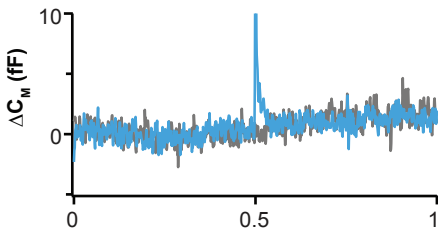

**Uncaging flash #3**

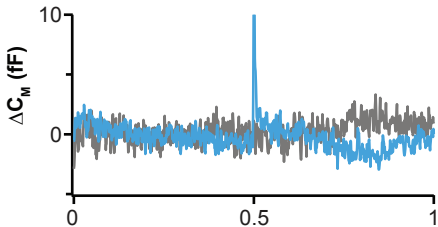

**Uncaging flash #4**

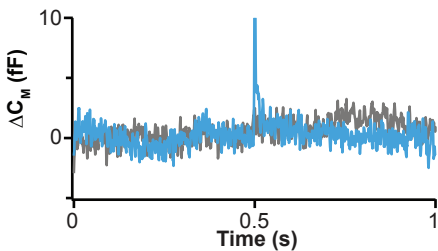

Supplement: supp [file elife-30203-supp-v1.zip]

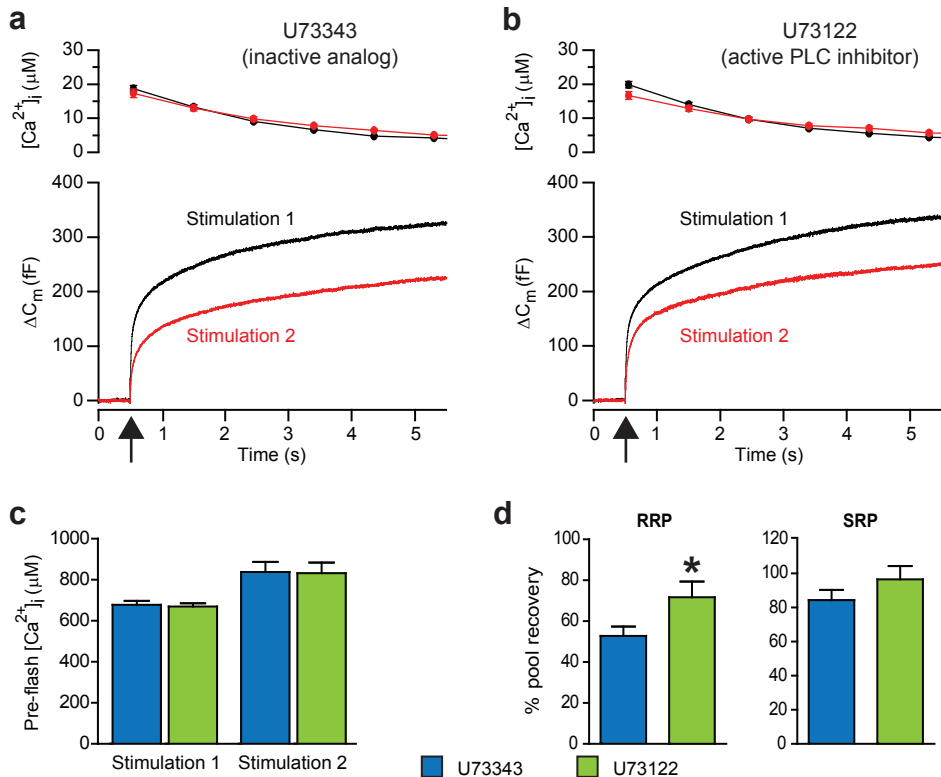

Walter et al., Fig. 5 - Figure supplement 1

Supplement: supp [file elife-30203-supp-v1.zip]

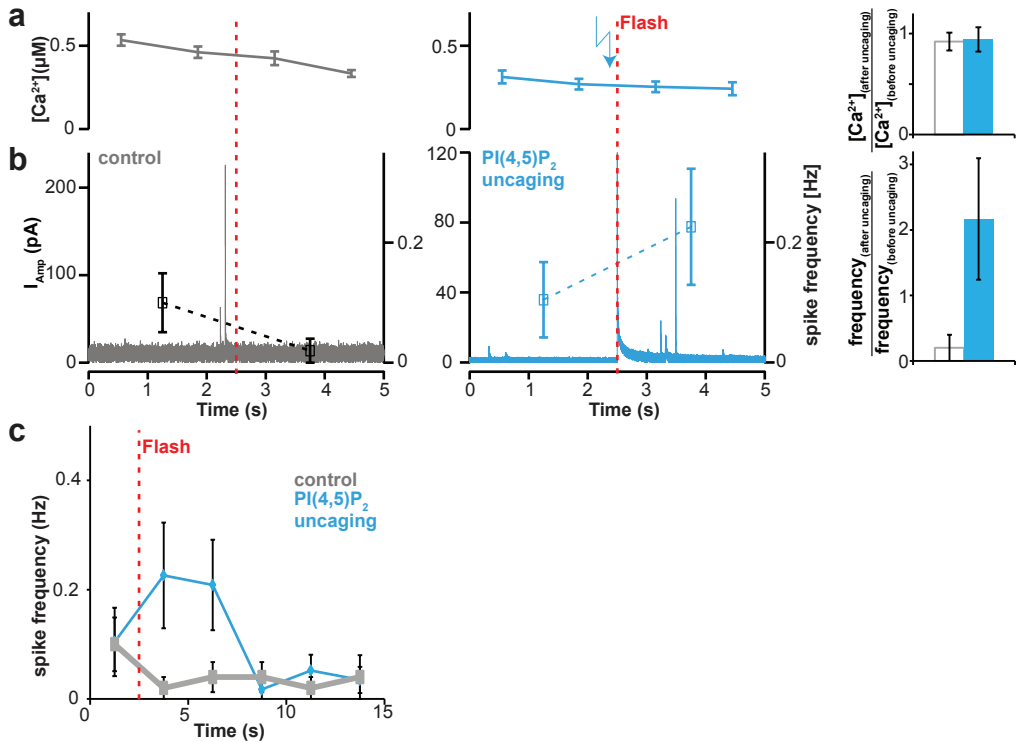

Walter et al., Fig. 4 - Figure supplement 3

Supplement: supp [file elife-30203-supp-v1.zip]

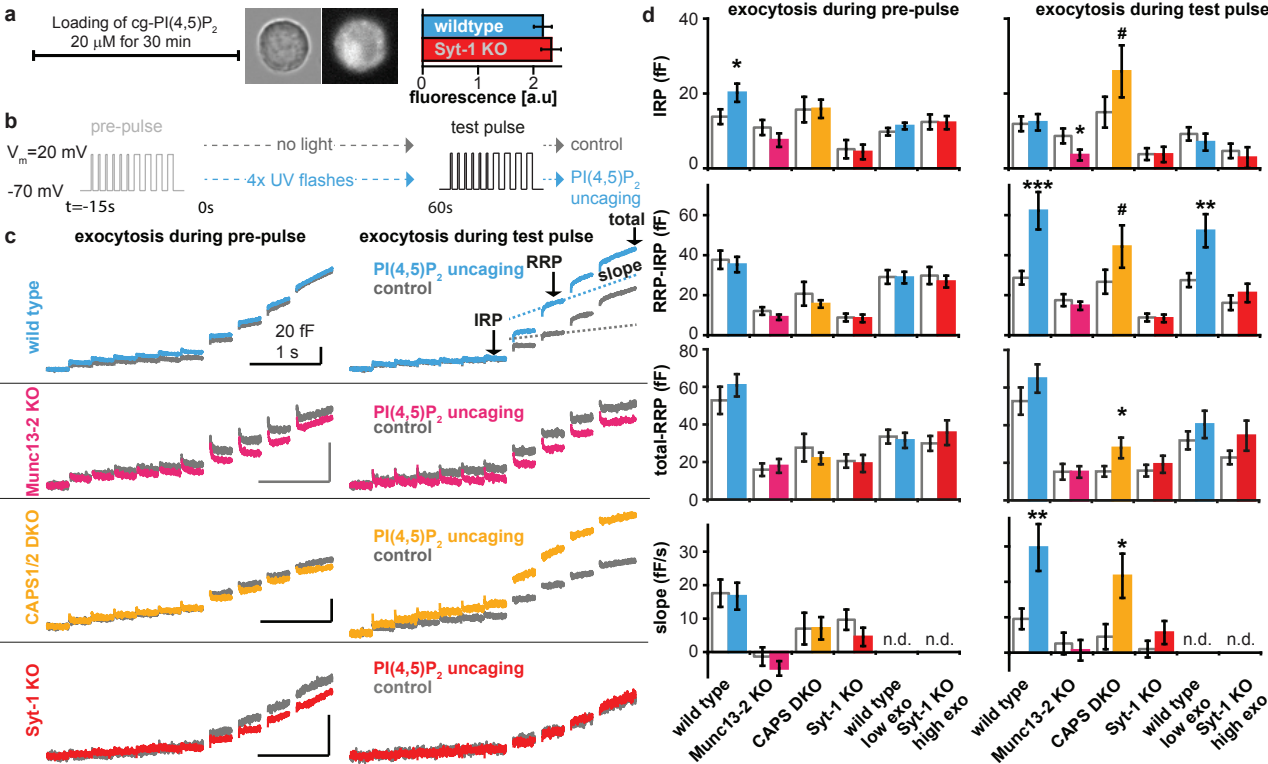

Supplement: supp [file elife-30203-supp-v1.zip]
